# Supplementary material for: Nitrobenzoxadiazoles and related heterocycles: a relationship between aromaticity, superelectrophilicity and pericyclic reactivity
Source: Royal Society of Chemistry journal article supplement (doi:10.1039/b602002j), 2006-01-01
Supplement: b602002j.pdf [file b602002j.pdf]

## Supplementary Information

### Table of contents:

|           |      |
|-----------|------|
| Figure S1 | p.2  |
| Figure S2 | p.3  |
| Figure S3 | p.4  |
| Table S1  | p.5  |
| Table S2  | p.6  |
| Table S3  | p.7  |
| Table S4  | p.8  |
| Table S5  | p.9  |
| Table S6  | p.10 |
| Table S7  | p.11 |

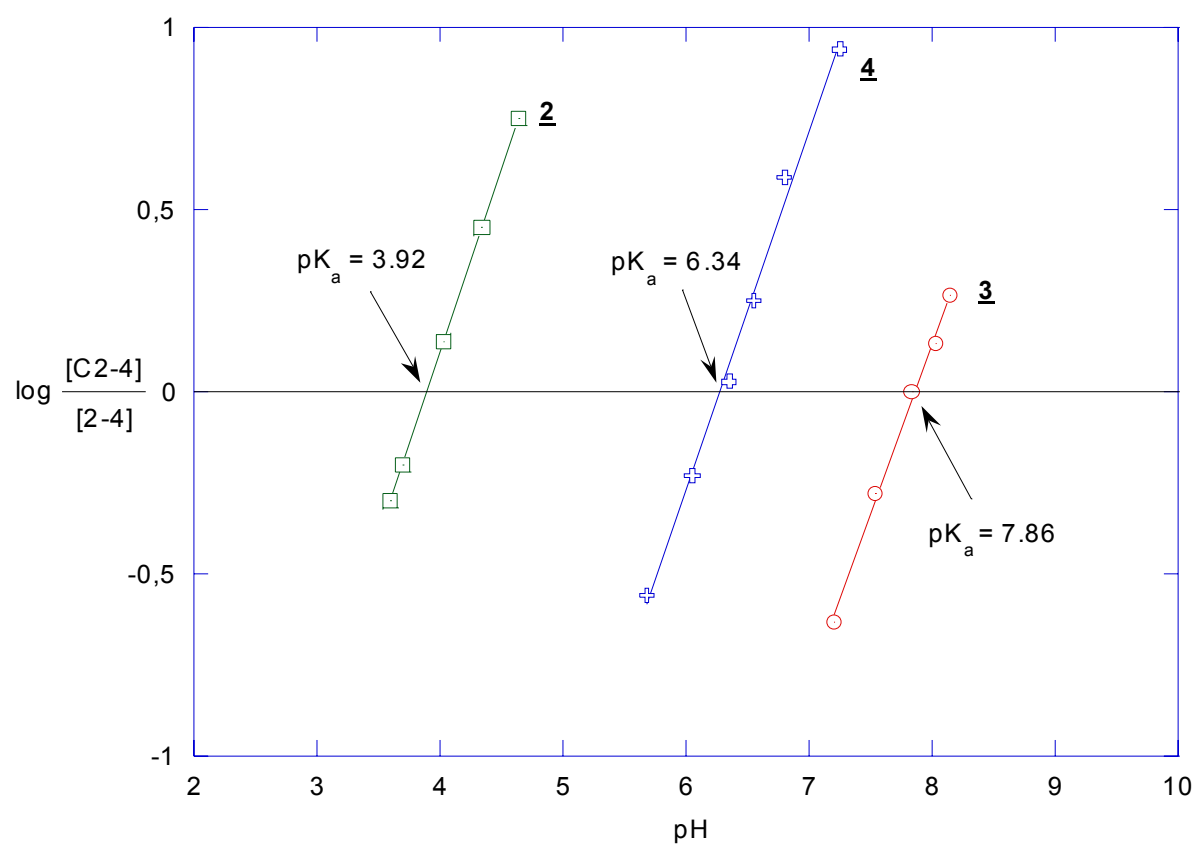

Figure S1 : Effect of pH on the  $\sigma$ -complexation of DNBZ (**2**), DNBS (**3**) and DNBSe (**4**) at  $T = 25^\circ\text{C}$  in aqueous solution;  $I = 0.2 \text{ mol dm}^{-3} \text{ KCl}$ .

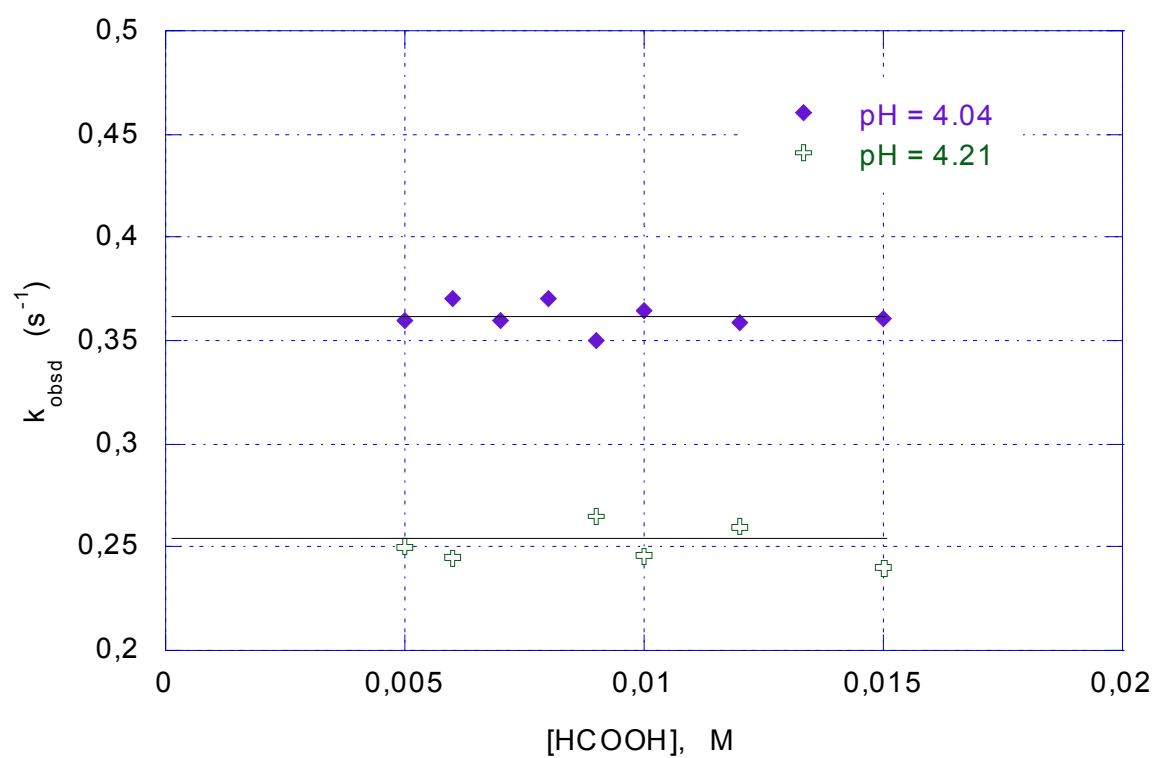

Figure S2 : Plot showing the lack of buffer dependence of  $k_{\text{obsd}}$  in formic acid buffers at pH 4.04 and 4.21 in the DNBS<sub>e</sub> system.

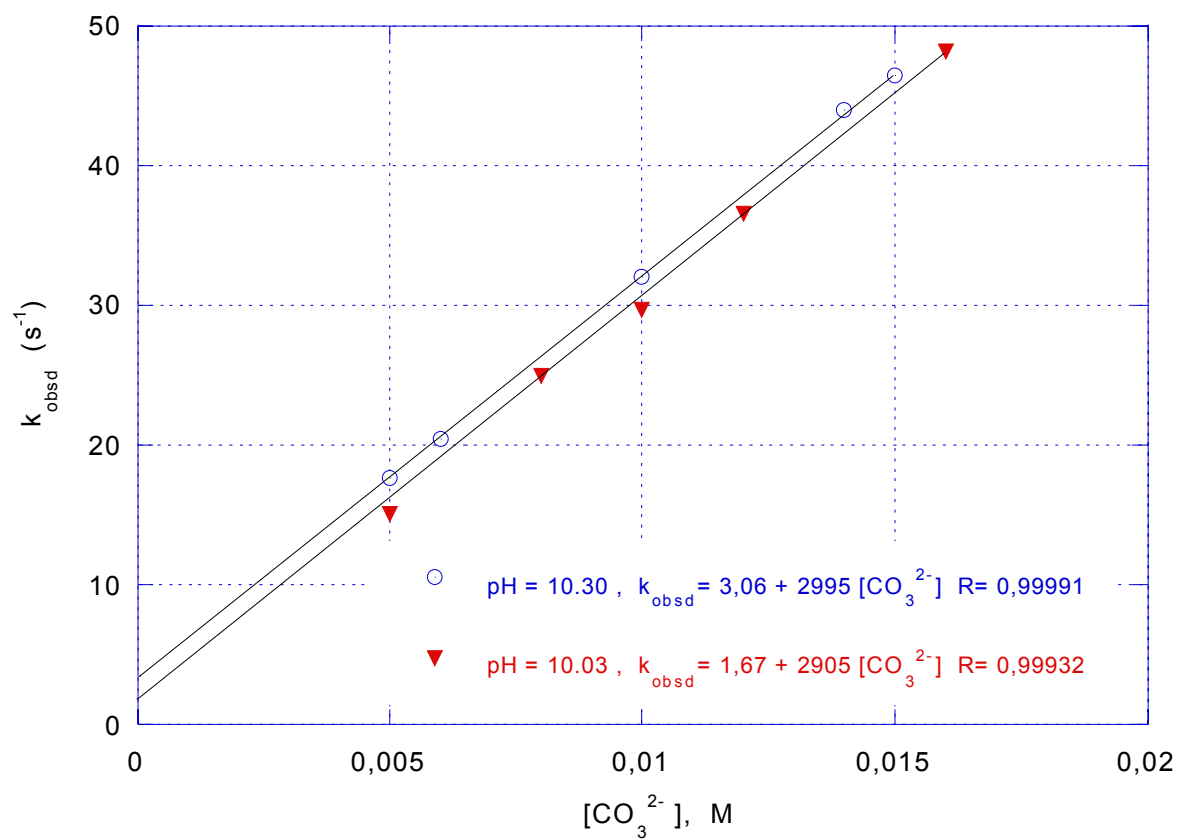

Figure S3 : Effect of carbonate concentration and pH on  $k_{\text{obsd}}$  for formation of the DNBZ adduct C-2 in aqueous solution ;  $T = 25 \text{ }^\circ\text{C}$ ,  $I = 0.2 \text{ mol dm}^{-3}$  KCl.

Table S1. Observed first-order-rate constants,  $k_{\text{obsd}}$ , for formation and decomposition of the adduct **C-2** in water.<sup>a</sup>

| pH                | $k_{\text{obsd}}, \text{s}^{-1}$ | pH                 | $k_{\text{obsd}}, \text{s}^{-1}$ |
|-------------------|----------------------------------|--------------------|----------------------------------|
| 1.12 <sup>b</sup> | 12.67                            | 7.27 <sup>f</sup>  | 0.032                            |
| 1.34 <sup>b</sup> | 7.73                             | 7.53 <sup>f</sup>  | 0.038                            |
| 1.82 <sup>b</sup> | 2.58                             | 7.83 <sup>f</sup>  | 0.052                            |
| 2.12 <sup>b</sup> | 1.23                             | 8.38 <sup>g</sup>  | 0.31                             |
| 2.34 <sup>b</sup> | 0.73                             | 9.30 <sup>h</sup>  | 0.46                             |
| 2.82 <sup>b</sup> | 0.19                             | 9.73 <sup>h</sup>  | 1.55                             |
| 3.48 <sup>c</sup> | 0.087                            | 10.03 <sup>h</sup> | 3.05                             |
| 3.74 <sup>c</sup> | 0.058                            | 10.30 <sup>h</sup> | 4.80                             |
| 3.97 <sup>c</sup> | 0.040                            | 11.15 <sup>i</sup> | 26.9                             |
| 4.40 <sup>d</sup> | 0.029                            | 11.45 <sup>i</sup> | 58                               |
| 4.70 <sup>d</sup> | 0.026                            | 11.65 <sup>i</sup> | 98                               |
| 5.00 <sup>d</sup> | 0.024                            | 11.75 <sup>i</sup> | 118                              |
| 6.00 <sup>e</sup> | 0.024                            | 12.05 <sup>i</sup> | 155                              |
| 6.28 <sup>e</sup> | 0.024                            | 12.35 <sup>i</sup> | 600                              |
| 6.58 <sup>e</sup> | 0.025                            | 12.53 <sup>i</sup> | 926                              |

(a) at zero buffer concentration;  $I = 0.20 \text{ mol dm}^{-3}$ ;  $T = 25^\circ\text{C}$ ;

(b) HCl solutions;

(c) Formate buffer;

(d) acetate buffer;

(e) cacodylate buffer;

(f) TES buffer;

(g) bicarbonate buffer;

(h) carbonate buffer;

(i) KOH solutions.

Table S2. Observed first-order-rate constants,  $k_{\text{obsd}}$ , for formation and decomposition of the adduct **C-3** in water.<sup>a</sup>

| pH                | $k_{\text{obsd}}, \text{s}^{-1}$ | pH                 | $k_{\text{obsd}}, \text{s}^{-1}$ |
|-------------------|----------------------------------|--------------------|----------------------------------|
| 2.12 <sup>b</sup> | 86.36                            | 7.02 <sup>f</sup>  | 0.0068                           |
| 2.42 <sup>b</sup> | 42.05                            | 8.12 <sup>g</sup>  | 0.0081                           |
| 2.52 <sup>b</sup> | 31.52                            | 9.73 <sup>h</sup>  | 0.018                            |
| 2.70 <sup>b</sup> | 10.36                            | 10.03 <sup>h</sup> | 0.025                            |
| 3.48 <sup>c</sup> | 2.95                             | 11.00 <sup>i</sup> | 0.25                             |
| 3.74 <sup>c</sup> | 1.51                             | 11.30 <sup>i</sup> | 0.57                             |
| 3.97 <sup>c</sup> | 0.344                            | 11.47 <sup>i</sup> | 0.62                             |
| 4.21 <sup>c</sup> | 0.46                             | 11.60 <sup>i</sup> | 1.00                             |
| 4.40 <sup>d</sup> | 0.32                             | 11.78 <sup>i</sup> | 1.31                             |
| 4.70 <sup>d</sup> | 0.10                             | 12.20 <sup>i</sup> | 4.09                             |
| 6.50 <sup>e</sup> | 0.008                            | 12.67 <sup>i</sup> | 14.16                            |

(a) at zero buffer concentration;  $I = 0.20 \text{ mol dm}^{-3}$ ;  $T = 25^\circ\text{C}$ ;

(b) HCl solutions;

(c) Formate buffer;

(d) acetate buffer;

(e) cacodylate buffer;

(f) phosphate buffer;

(g) bicarbonate buffer;

(h) carbonate buffer;

(i) KOH solutions.

Table S3. Observed first-order-rate constants,  $k_{\text{obsd}}$ , for formation and decomposition of the adduct **C-4** in water.<sup>a</sup>

| pH                | $k_{\text{obsd}}, \text{s}^{-1}$ | pH                 | $k_{\text{obsd}}, \text{s}^{-1}$ |
|-------------------|----------------------------------|--------------------|----------------------------------|
| 2.12 <sup>b</sup> | 163                              | 8.12 <sup>f</sup>  | 0.0091                           |
| 2.22 <sup>b</sup> | 126                              | 8.38 <sup>g</sup>  | 0.013                            |
| 2.42 <sup>b</sup> | 73                               | 9.50 <sup>h</sup>  | 0.154                            |
| 2.52 <sup>b</sup> | 57.5                             | 9.72 <sup>h</sup>  | 0.251                            |
| 2.82 <sup>b</sup> | 24.83                            | 10.03 <sup>h</sup> | 0.49                             |
| 4.40 <sup>c</sup> | 0.70                             | 10.38 <sup>i</sup> | 0.85                             |
| 4.70 <sup>c</sup> | 0.276                            | 11.60 <sup>i</sup> | 16.41                            |
| 5.00 <sup>c</sup> | 0.158                            | 12.00 <sup>i</sup> | 40.34                            |
| 6.50 <sup>d</sup> | 0.0062                           | 12.20 <sup>i</sup> | 73.66                            |
| 6.72 <sup>e</sup> | 0.0047                           | 12.30 <sup>i</sup> | 89.33                            |
| 7.02 <sup>e</sup> | 0.0041                           | 12.48 <sup>i</sup> | 136.3                            |
| 7.83 <sup>f</sup> | 0.0055                           | 12.60 <sup>i</sup> | 180.4                            |

(a) at zero buffer concentrations;  $I = 0.20 \text{ mol dm}^{-3}$ ;  $T = 25^\circ\text{C}$ ;

(b) HCl solutions;

(c) acetate buffer;

(d) cacodylate buffer;

(e) phosphate buffer

(f) TES buffer;

(g) bicarbonate buffer;

(h) carbonate buffer;

(i) KOH solutions

Table S4: Selected  $^1\text{H}$  nmr data for isoprene and 2,3-dimethylbutadiene Adducts of **2-4** and DNBF **1** in  $\text{CDCl}_3$ .<sup>a)</sup>

| Compounds  | H <sub>5</sub> | H <sub>7</sub> | H <sub>10</sub> | H <sub>12</sub> | H <sub>13</sub> | H <sub>14</sub> | H <sub>15</sub> | H <sub>17</sub> | CH <sub>3</sub>            |
|------------|----------------|----------------|-----------------|-----------------|-----------------|-----------------|-----------------|-----------------|----------------------------|
| <b>11a</b> | 7.57           | 4.22           | 2.67<br>2.32    | 5.49            | 3.14<br>2.81    | -               | -               | -               | 1.77                       |
| <b>11b</b> | 7.54           | 4.15           | 2.66<br>2.28    | -               | 3.09<br>2.71    | -               | -               | -               | 1.75<br>1.70               |
| <b>12a</b> | 3.90           | 4.19           | 2.76<br>2.45    | 5.34            | 2.85<br>2.41    | 3.21            | 5.43            | 2.15<br>1.93    | 1.71<br>1.66               |
| <b>12b</b> | 3.78           | 4.19           | 2.73<br>2.34    | -               | 2.78<br>2.27    | 3.14            | -               | 2.08<br>1.85    | 1.67 ; 1.65<br>1.60 ; 1.56 |
| <b>13a</b> | 7.71           | 4.39           | 2.76<br>2.41    | 5.44            | 3.16<br>2.61    | -               | -               | -               | 1.77                       |
| <b>13b</b> | 7.64           | 4.34           | 2.73<br>2.51    | -               | 3.09<br>2.51    | -               | -               | -               | 1.71                       |
| <b>14a</b> | 3.97           | 4.14           | 2.88<br>2.67    | 5.23            | 2.88<br>2.31    | 3.22<br>3.02    | 5.39            | 2.23<br>2.03    | 1.66                       |
| <b>14b</b> | 3.89           | 4.07           | 2.85<br>2.65    | -               | 2.79<br>2.23    | 3.21<br>2.99    | -               | 2.26<br>1.95    | 1.62 ; 1.56                |
| <b>16a</b> | 4.03           | 4.07           | 2.52            | 5.27            | 2.52            | 3.31<br>2.94    | 5.41            | 2.2             | 1.69 ; 1.66                |
| <b>16b</b> | 3.86           | 4.06           | 2.75            | -               | 2.80<br>2.39    | 3.22<br>2.87    | -               | 2.10            | 1.62 ; 1.60<br>1.58 ; 1.56 |
| <b>18a</b> | 3.99           | 4.12           | 2.68            | 5.34            | 2.82            | 3.50<br>2.59    | 5.45            | 2.27            | 1.71 ; 1.68                |
| <b>18b</b> | 4.10           | 3.91           | 2.68            | -               | 2.72<br>2.62    | 3.40<br>2.65    | -               | 2.22            | 1.67 ; 1.65                |

a)  $\delta$  in ppm, internal reference  $\text{Me}_4\text{Si}$ .



Table S5: Selected  $^{13}\text{C}$  nmr data for isoprene and 2,3-dimethylbutadiene Adducts of **2-4** and DNBF **1** in  $\text{CDCl}_3$ .<sup>a)</sup>

| Compounds  | C <sub>4</sub> | C <sub>5</sub> | C <sub>6</sub> | C <sub>7</sub> | C <sub>8</sub> | C <sub>9</sub> | C <sub>10</sub> | C <sub>11</sub> | C <sub>12</sub> | C <sub>13</sub> | C <sub>14</sub> | C <sub>15</sub> | C <sub>16</sub> | C <sub>17</sub> | CH <sub>3</sub>            |
|------------|----------------|----------------|----------------|----------------|----------------|----------------|-----------------|-----------------|-----------------|-----------------|-----------------|-----------------|-----------------|-----------------|----------------------------|
| <b>11a</b> | 141.1          | 137.6          | 87.3           | 33.1           | 109.7          | 143.5          | 29.1            | 134.4           | 115.5           | 34.6            | -               | -               | -               | -               | 22.6                       |
| <b>11b</b> | 141.1          | 137.3          | 88.2           | 33.2           | 109.9          | 143.4          | 30.6            | 126.5           | 121.6           | 40.1            | -               | -               | -               | -               | 18.8 ; 18.1                |
| <b>12a</b> | 86.3           | 42.2           | 92.6           | 30.6           | 112.3          | 149.6          | 28.1            | 135.0           | 116.3           | 32.2            | 33.5            | 115.9           | 131.7           | 28.5            | 22.6 ; 22.6                |
| <b>12b</b> | 86.8           | 43.5           | 93.9           | 30.4           | 112.4          | 149.5          | 29.4            | 126.2           | 123.2           | 38.0            | 38.9            | 122.0           | 123.2           | 30.5            | 18.6 ; 18.3<br>18.1        |
| <b>13a</b> | 143.2          | 138.4          | 88.0           | 33.3           | 154.3          | 144.2          | 30.2            | 133.8           | 115.1           | 34.6            | -               | -               | -               | -               | 22.8                       |
| <b>13b</b> | 142.0          | 138.0          | 88.8           | 33.4           | 153.3          | 143.3          | 32.0            | 125.5           | 121.0           | 39.1            | -               | -               | -               | -               | 18.8; 18.4                 |
| <b>14a</b> | 86.0           | 42.0           | 91.3           | 30.9           | 153.7          | 148.1          | 32.4            | 133.5           | 115.4           | 31.1            | 35.7            | 116.3           | 133.5           | 27.6            | 22.3 ; 22.5                |
| <b>14b</b> | 86.6           | 43.5           | 92.4           | 30.8           | 153.9          | 148.2          | 33.4            | 125.3           | 124.9           | 36.8            | 41.8            | 121.3           | 123.3           | 29.7            | 18.9 ; 18.4<br>18.2        |
| <b>16a</b> | 92.1           | 41.6           | 89.4           | 37.5           | 160.9          | 152.4          | 31.9            | 132.7           | 115.6           | 33.2            | 35.2            | 116.8           | 123.9           | 27.9            | 22.5 ; 22.2                |
| <b>16b</b> | 92.8           | 42.7           | 89.8           | 36.9           | 160.8          | 152.4          | 34.0            | 124.4           | 121.2           | 37.2            | 41.0            | 123.1           | 124.8           | 29.6            | 18.2 ; 18.5<br>18.0 ; 18.3 |
| <b>18a</b> | 91.7           | 39.7           | 92.7           | 41.7           | 163.7          | 157.0          | 34.6            | 132.3           | 115.9           | 32.5            | 34.3            | 117.2           | 133.5           | 27.3            | 22.7 ; 22.2                |
| <b>18b</b> | 92.8           | 41.3           | 93.5           | 41.6           | 164.0          | 157.2          | 35.4            | 124.2           | 124.0           | 38.0            | 40.6            | 124.0           | 124.8           | 29.5            | 18.9 ; 18.5<br>18.0 ; 18.3 |

a)  $\delta$  in ppm, internal reference  $\text{Me}_4\text{Si}$ .

Table S6: <sup>1</sup>H nmr data for the cyclopentadiene and cyclohexadiene adducts of **2-4**, **5a** and DNBF **1** in CDCl<sub>3</sub>.<sup>a)</sup>

| Compounds | H <sub>5</sub> | H <sub>7</sub> | H <sub>10</sub> | H <sub>11</sub> | H <sub>12</sub> | H <sub>13</sub> | H <sub>14</sub> | H <sub>15</sub> | H <sub>16</sub> | H <sub>17</sub> | H <sub>18</sub> | H <sub>19</sub> | Pi   |
|-----------|----------------|----------------|-----------------|-----------------|-----------------|-----------------|-----------------|-----------------|-----------------|-----------------|-----------------|-----------------|------|
| <b>9</b>  | 3.49           | 4.06           | 3.98            | 5.77            | 5.95            | 6.21            | 2.41<br>2.16    | 4.06            | 6.38            | 6.69            | 3.49            | 1.80<br>1.18    | -    |
| <b>10</b> | 3.49           | 4.06           | 3.98            | 5.77            | 5.95            | 6.21            | 2.41<br>2.16    | 4.06            | 6.38            | 6.69            | 3.49            | 1.80<br>1.18    | 9.23 |
| <b>19</b> | 3.55           | 4.35           | 3.89            | 5.79            | 5.95            | 6.19            | 2.34<br>2.00    | 4.00            | 6.38            | 6.69            | 3.52            | 1.74<br>1.00    | -    |
| <b>20</b> | 3.52           | 4.31           | 3.90            | 5.77            | 5.94            | 6.15            | 2.19<br>1.98    | 3.98            | 6.39            | 6.64            | 3.50            | 1.64<br>0.96    | -    |
| <b>21</b> | 8.02           | 4.11           | 3.46            | 6.67            | 6.37            | 3.78            | 1.18<br>1.39    | 1.39<br>1.83    | -               | -               | -               | -               | -    |
| <b>22</b> | 8.00           | 4.46           | 3.35            | 6.72            | 6.35            | 3.82            | 1.16<br>1.46    | 1.46<br>1.87    | -               | -               | -               | -               | -    |
| <b>23</b> | 7.38           | 4.40           | 3.47            | 6.67            | 6.29            | 3.64            | 1.16<br>1.44    | 1.44<br>1.57    | -               | -               | -               | -               | -    |
| <b>24</b> | 7.29           | 4.37           | 3.50            | 6.65            | 6.28            | 3.63            | 1.16<br>1.45    | 1.45<br>1.63    | -               | -               | -               | -               | -    |
| <b>25</b> | 7.56           | 4.36           | 3.65            | 6.72            | 6.59            | 3.65            | 0.86<br>1.36    | 1.36<br>1.77    | -               | -               | -               | -               | 9.26 |

a) δ in ppm, internal reference Me<sub>4</sub>Si.

Table S7:  $^{13}\text{C}$  nmr data for the cyclopentadiene and cyclohexadiene adducts of **2-4**, **5a** and DNBF **1** in  $\text{CDCl}_3$ .<sup>a)</sup>

| Adducts   | C <sub>4</sub> | C <sub>5</sub> | C <sub>6</sub> | C <sub>7</sub> | C <sub>8</sub> | C <sub>9</sub> | C <sub>10</sub> | C <sub>11</sub> | C <sub>12</sub> | C <sub>13</sub> | C <sub>14</sub> | C <sub>15</sub> | C <sub>16</sub> | C <sub>17</sub> | C <sub>18</sub> | C <sub>19</sub> | Pi                             |
|-----------|----------------|----------------|----------------|----------------|----------------|----------------|-----------------|-----------------|-----------------|-----------------|-----------------|-----------------|-----------------|-----------------|-----------------|-----------------|--------------------------------|
| <b>9</b>  | 91.27          | 47.54          | 121.82         | 32.17          | 111.35         | 152.69         | 36.61           | 91.67           | 127.52          | 139.36          | 34.60           | 54.56           | 134.27          | 141.90          | 46.11           | 46.24           | -                              |
| <b>10</b> | 93.2           | 49.0           | 123.1          | 33.5           | 124.4          | 145.7          | 38.4            | 93.0            | 128.3           | 140.4           | 35.3            | 55.2            | 135.4           | 142.3           | 47.4            | 47.1            | 124.4 ;128.3<br>147.2 ; 150.4  |
| <b>19</b> | 90.1           | 47.6           | 123.2          | 32.7           | 152.2          | 150.7          | 43.0            | 91.8            | 127.0           | 140.0           | 35.2            | 55.2            | 134.6           | 141.2           | 46.4            | 46.6            | -                              |
| <b>20</b> | 94.5           | 54.5           | 124.7          | 38.4           | 157.0          | 154.7          | 43.2            | 91.8            | 127.0           | 140.0           | 35.0            | 54.8            | 135.2           | 140.7           | 46.3            | 46.3            | -                              |
| <b>21</b> | 141.4          | 137.8          | 93.8           | 37.1           | 110.8          | 146.0          | 30.18           | 136.4           | 131.5           | 40.5            | 21.2            | 18.4            | -               | -               | -               | -               | -                              |
| <b>22</b> | 137.7          | 137.1          | 92.3           | 59.3           | 153.5          | 143.6          | 36.7            | 136.9           | 130.9           | 40.4            | 21.5            | 18.2            | -               | -               | -               | -               | -                              |
| <b>23</b> | 147.8          | 131.2          | 94.2           | 45.1           | 157.0          | 154.7          | 36.7            | 136.6           | 130.1           | 39.6            | 20.4            | 18.2            | -               | -               | -               | -               | -                              |
| <b>24</b> | 149.2          | 130.7          | 94.0           | 45.1           | 163.1          | 150.2          | 33.2            | 136.5           | 130.0           | 36.7            | 20.5            | 18.3            | -               | -               | -               | -               | -                              |
| <b>25</b> | 141.1          | 136.4          | 93.7           | 36.3           | 122.8          | 136.1          | 29.2            | 133.8           | 130.2           | 39.7            | 20.6            | 18.1            | -               | -               | -               | -               | 124.5 ;124.7 1<br>46.5 ; 148.7 |

a)  $\delta$  in ppm, internal reference  $\text{Me}_4\text{Si}$ .
